# Supplementary material for: Catalyst-free N-methylation of 3-methylxanthine with dimethyl carbonate in water: green synthesis of theobromine
Source: Royal Society of Chemistry journal article supplement (doi:10.1039/d2nj01624a), 2022-01-01
Supplement: d2nj01624a1.pdf [file d2nj01624a1.pdf]

## Catalyst-free N-methylation of 3-methylxanthine with dimethyl carbonate in water: green synthesis of theobromine

Hansen Yang<sup>a</sup>, Zhimiao Wang<sup>a,b</sup>, Hualiang An<sup>a,b</sup>, Qiusheng Yang<sup>a,b</sup>, Wei Xue<sup>a,b\*</sup>, Fang Li<sup>a,b\*</sup>, Yanji Wang<sup>a,b,c</sup>

*New Journal of Chemistry*

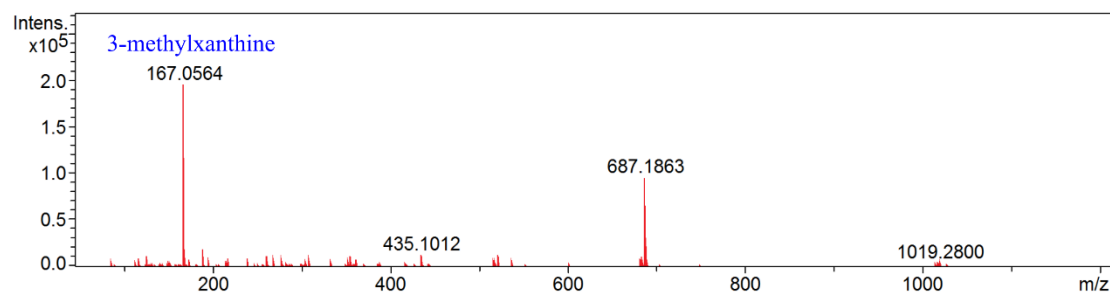

Figure S1 LC-MS diagram of pure 3-methylxanthine

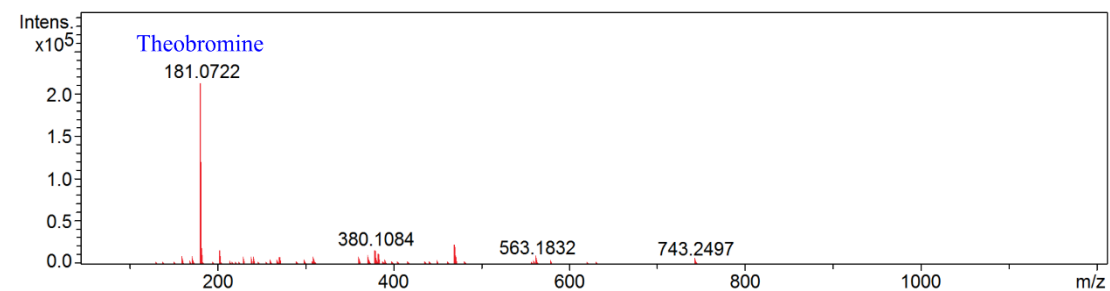

Figure S2 LC-MS diagram of pure theobromine

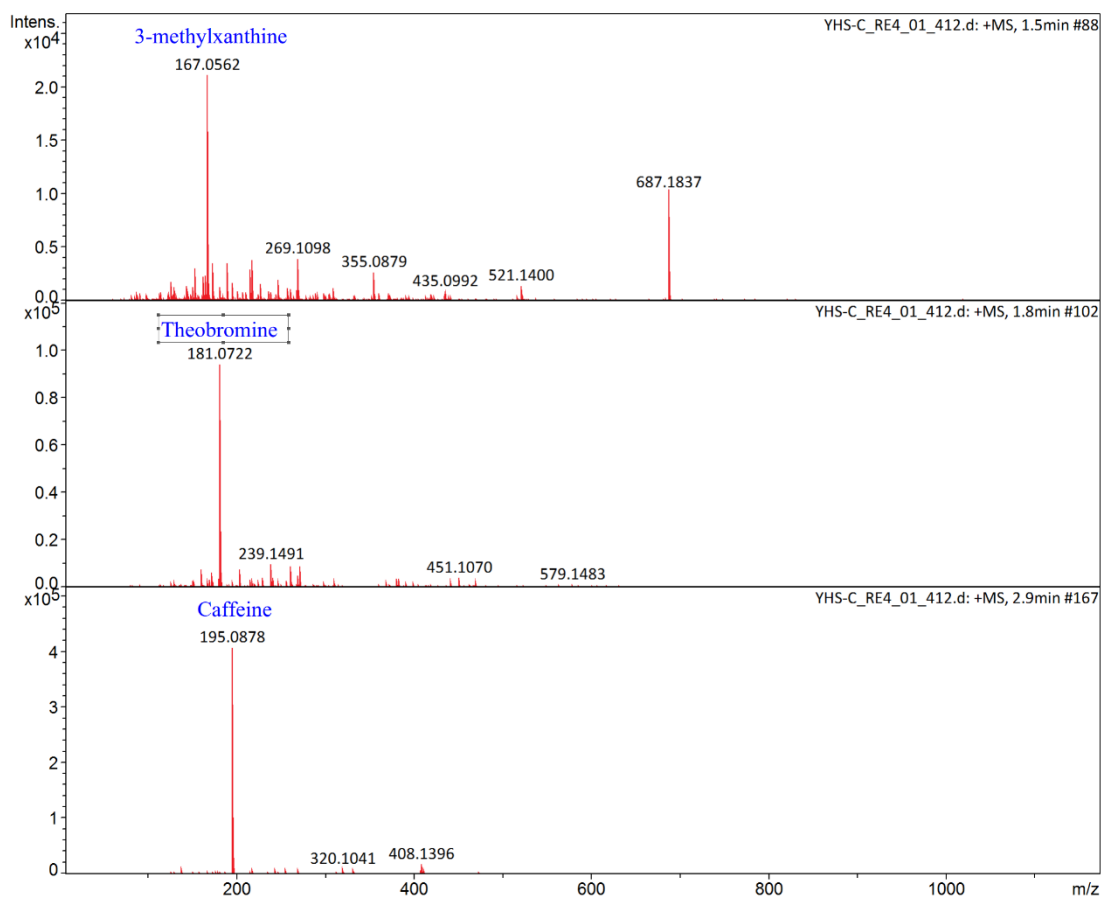

**Figure S3** LC-MS diagram of Product mixture

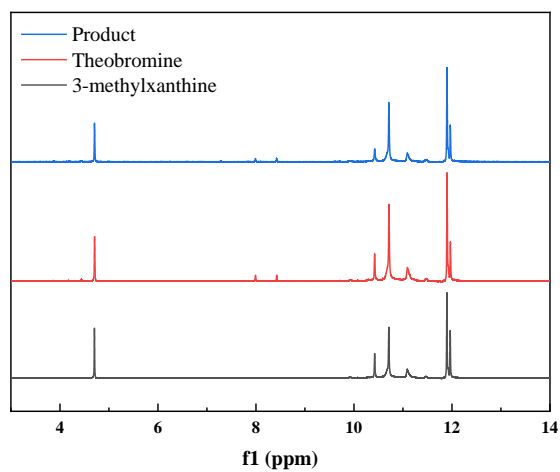

**Figure S4** <sup>1</sup>H NMR spectra of 3-methylxanthine, theobromine and product

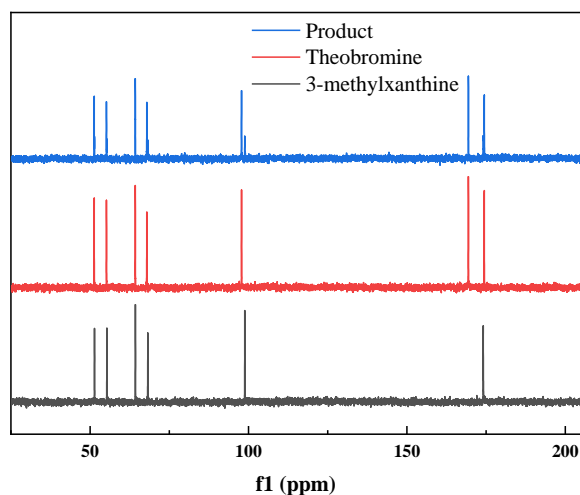

**Figure S5**  $^{13}\text{C}$  NMR spectra of 3-methylxanthine, theobromine and product

**Table S1** Effect of the ratio of mixed solvent water/DMF on methylation of 3-methylxanthine with DMC (Reaction conditions: 3-methylxanthine (2 g),  $\text{H}_2\text{O}$ , 9 h,  $160\text{ }^\circ\text{C}$ ,  $n(\text{DMC}):n(3\text{-methylxanthine}) = 5.5:1$ )

| No. | Solvent (mL)         |     | 3-methylxanthine conversion (%) | selectivity (%) |          |
|-----|----------------------|-----|---------------------------------|-----------------|----------|
|     | $\text{H}_2\text{O}$ | DMF |                                 | Theobromine     | Caffeine |
| 1   | 10                   | 0   | 59.4                            | 96.3            | 1.1      |
| 2   | 9                    | 1   | 64.0                            | 93.9            | 3.3      |
| 3   | 8                    | 2   | 76.8                            | 91.7            | 5.9      |
| 4   | 7                    | 3   | 78.5                            | 88.1            | 9.8      |
| 5   | 6                    | 4   | 86.6                            | 85.0            | 12.4     |
| 6   | 5                    | 5   | 90.4                            | 80.9            | 16.5     |

**Table S2** Effect of reactant molar ratios on methylation of 3-methylxanthine with DMC. Reaction conditions: 3-methylxanthine (1 g),  $\text{H}_2\text{O}$  (10 mL), 9 h,  $160\text{ }^\circ\text{C}$

| No. | $n(\text{DMC}):n(3\text{-methylxanthine})$ | Initial pressure (MPa) | Residual pressure <sup>a</sup> (MPa) | 3-methylxanthine conversion (%) | Theobromine selectivity (%) |
|-----|--------------------------------------------|------------------------|--------------------------------------|---------------------------------|-----------------------------|
| 1   | 5                                          | 0                      | 0.9                                  | 60.3                            | 96.8                        |
| 2   | 8                                          | 0                      | 1.4                                  | 82.1                            | 97.4                        |
| 3   | 11                                         | 0                      | 1.8                                  | 89.9                            | 98.2                        |
| 4   | 14                                         | 0                      | 2                                    | 89.7                            | 98.3                        |
| 5   | 17                                         | 0                      | 2.1                                  | 89.9                            | 98.7                        |
| 6   | 20                                         | 0                      | 2.1                                  | 89.8                            | 98.1                        |

**Table S3 Bond Energy Summary**

| Bond Energy Summary |                    |            |                 |                          |        |
|---------------------|--------------------|------------|-----------------|--------------------------|--------|
| Solvents            | delta G (kcal/mol) |            |                 | C-O bond energy (KJ/mol) |        |
|                     | DMC                | Methyl     | Remaining group |                          |        |
| DMF                 | -343.50501         | -39.799655 | -303.57592      |                          | 339.98 |
| DMSO                | -343.504256        | -39.799029 | -303.575599     |                          | 340.49 |
| H <sub>2</sub> O    | -343.502763        | -39.79789  | -303.569785     |                          | 354.83 |
| MeOH                | -343.503842        | -39.799893 | -303.568708     |                          | 355.23 |
| EG                  | -343.498538        | -39.79765  | -303.563663     |                          | 360.44 |

  

| Solvents         | delta G (kcal/mol) |           |                                |                                | N <sup>1</sup> -H bond energy (KJ/mol) | N <sup>7</sup> -H bond energy (KJ/mol) |
|------------------|--------------------|-----------|--------------------------------|--------------------------------|----------------------------------------|----------------------------------------|
|                  | 3-methylxanthine   | H         | None H of N <sup>1</sup> group | None H of N <sup>7</sup> group |                                        |                                        |
| DMF              | -601.564018        | -0.494167 | -600.895491                    | -600.918702                    | 457.99                                 | 397.02                                 |
| DMSO             | -601.564075        | -0.49395  | -600.89442                     | -600.917462                    | 461.52                                 | 400.99                                 |
| H <sub>2</sub> O | -601.559131        | -0.492566 | -600.895648                    | -600.914961                    | 448.94                                 | 398.21                                 |
| MeOH             | -601.561068        | -0.494485 | -600.894067                    | -600.913431                    | 453.14                                 | 402.28                                 |
| EG               | -601.553235        | -0.493818 | -600.886802                    | -600.906013                    | 453.40                                 | 402.94                                 |
